# Supplementary material
Source: Elsevier journal article supplement (https://salinaspubliclibrary.org/sites/default/files/media_browser/mmc3.pdf)

# Computing for Beginners

## COMPUTER CLASS

Not sure how to start your digital journey?  
Sign up to learn computing basics: terminology, keyboard  
skills, email and online safety.

Friday & Saturday, 10AM-12PM  
Cesar Chavez Library

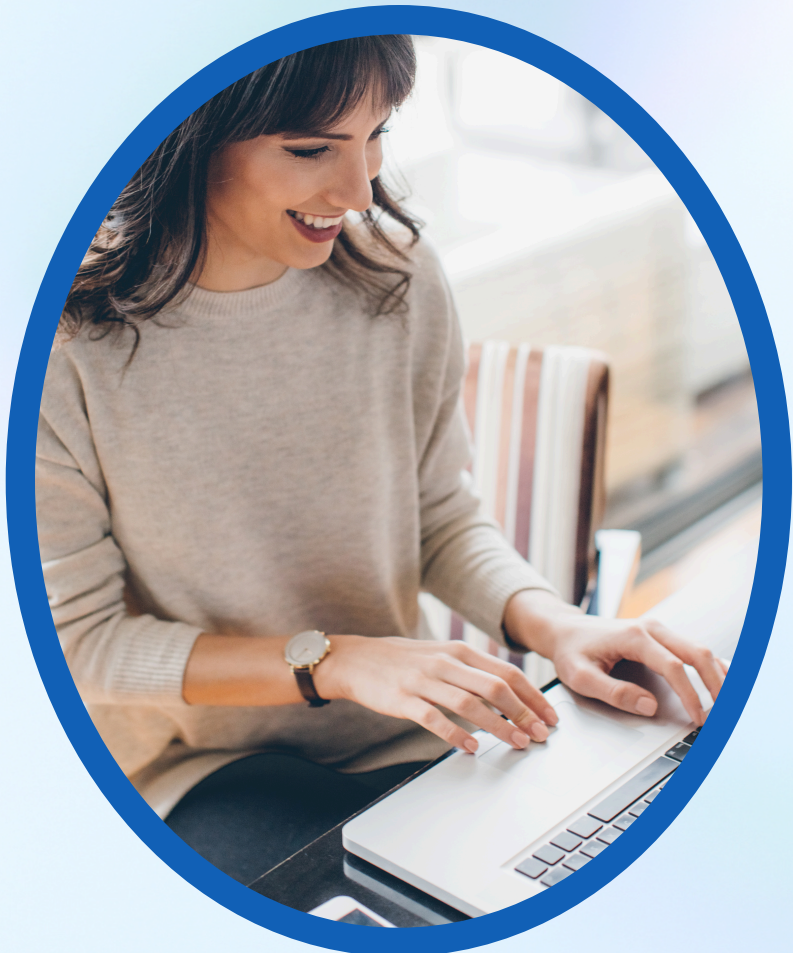

SCAN THE QR CODE  
TO REGISTER

**SCAN ME**

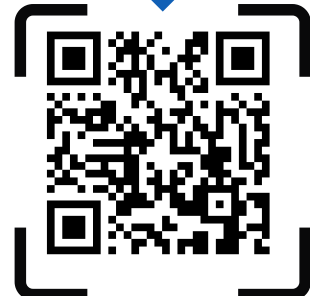



# Computación para Principiantes

## ***CLASE DE COMPUTACIÓN***

¿No está seguro de cómo comenzar su viaje digital?  
Regístrese para aprender los conceptos básicos de  
computación: terminología, habilidades con el teclado,  
correo electrónico y seguridad en línea.

Viernes Y Sábado, 10AM-12PM  
Biblioteca César Chávez

**ESCANEE EL CÓDIGO QR  
PARA REGISTRARSE**

**SCAN ME**

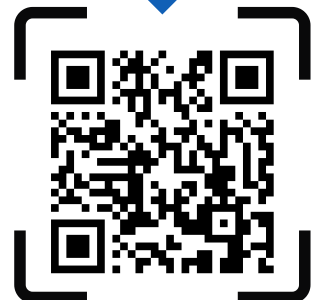

Supplement: mmc3 [file mmc3.pdf]
